# Supplementary material
Source: PubMed Central journal article supplement (PMC7510585)
Supplement: mmc1.pdf [file mmc1.pdf]

**Cell Reports, Volume 33**

## **Supplemental Information**

### **Furin Inhibitors Block SARS-CoV-2**

### **Spike Protein Cleavage to Suppress**

### **Virus Production and Cytopathic Effects**

**Ya-Wen Cheng, Tai-Ling Chao, Chiao-Ling Li, Mu-Fan Chiu, Han-Chieh Kao, Sheng-Han Wang, Yu-Hao Pang, Chih-Hui Lin, Ya-Min Tsai, Wen-Hau Lee, Mi-Hua Tao, Tung-Ching Ho, Ping-Yi Wu, Li-Ting Jang, Pei-Jer Chen, Sui-Yuan Chang, and Shiou-Hwei Yeh**

## Supplemental Information

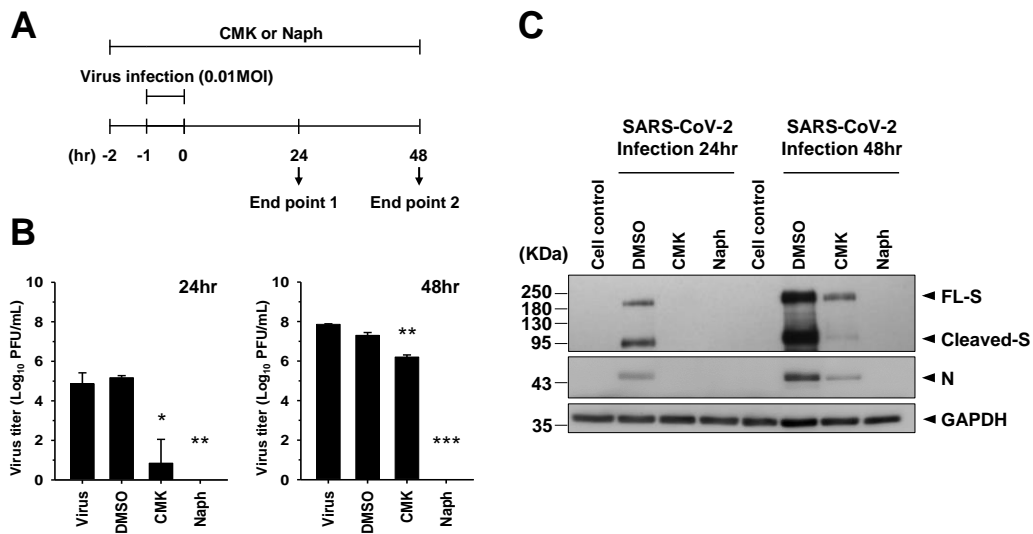

**Figure S1. The furin/PC inhibitors CMK and naphthofluorescein reduce viral replication in SARS-CoV-2-infected VeroE6 cells, by multi-step virus growth cycle setup. Related to Figure 3.**

(A) Schematic illustration of inhibitor treatment experiments. (B) Plaque assay was performed to determine the PFUs of SARS-CoV-2 virus in the supernatant of VeroE6 cells infected and subjected to inhibitor treatment (CMK 50  $\mu\text{M}$ ; naphthofluorescein 15  $\mu\text{M}$ ), which were applied 1 hr before infection and maintained in the medium until cell assessment at 24 hr or 48 hr post infection (Mean $\pm$ SD of triplicate,  $P < .05^*$ ;  $P < .01^{**}$ ;  $P < .001^{***}$ ). (C) Viral protein in SARS-CoV-2-infected VeroE6 cells treated with CMK or naphthofluorescein were detected by immunoblot analyses.

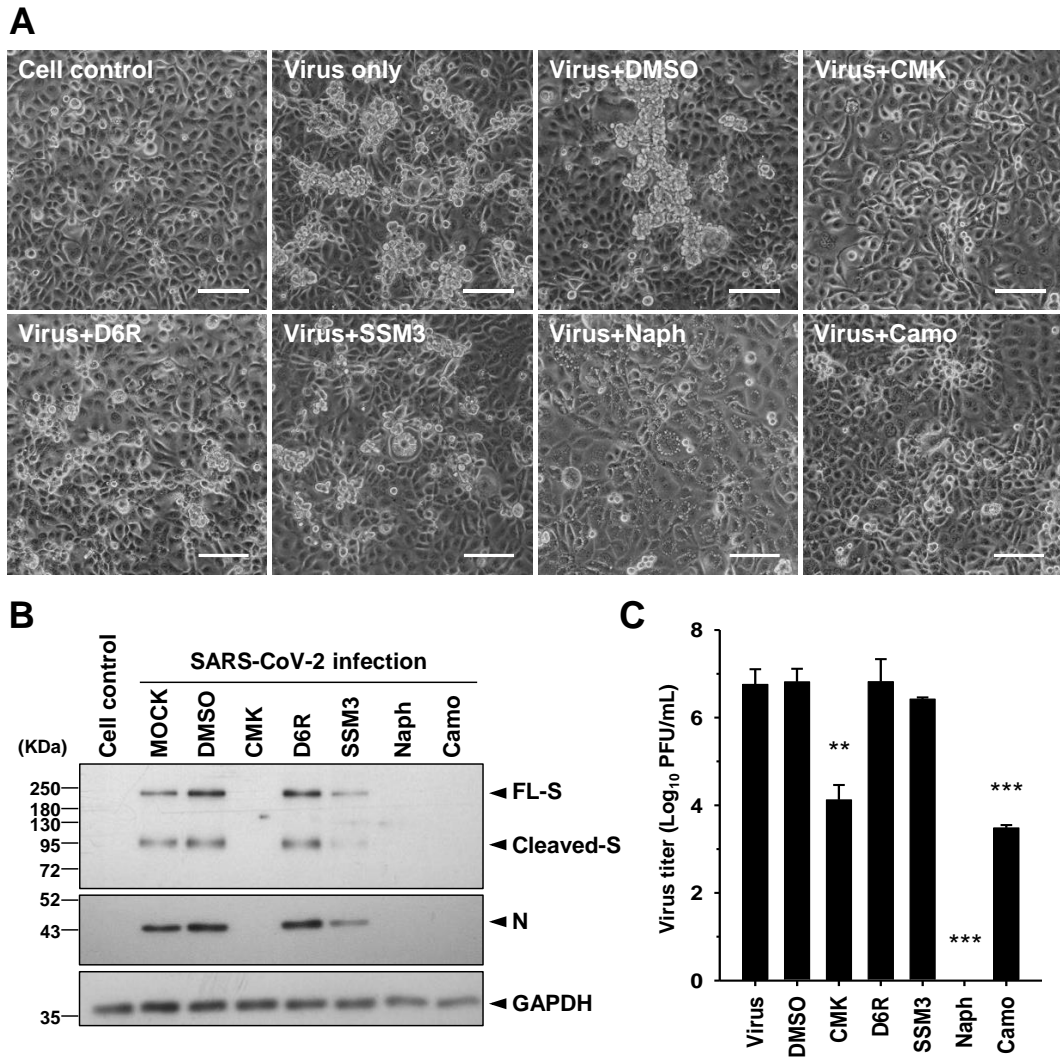

**Figure S2. CMK, naphthofluorescein and camostat inhibitors block CPE and viral production in SARS-CoV-2-infected MK2 cells. Related to Figure 3. (A)** Microscopic observation of CPE in MK2 cells infected with SARS-CoV-2 (MOI=1) in the absence or presence of CMK (50  $\mu$ M), D6R (50  $\mu$ M), SSM3 (25  $\mu$ M), naphthofluorescein (20  $\mu$ M) or camostat (500  $\mu$ M), which were applied 1 hr before infection and maintained in the medium until cell assessment 24 hr post treatment. Scale bars: 100  $\mu$ m. **(B)** Immunoblot of lysates from MK2 cells infected with SARS-CoV-2 (MOI=1), which were treated with different inhibitors as described in (A). The immunoblot was probed with anti-spike and anti-nucleocapsid Abs. Full-length (FL) spike proteins, cleaved spike proteins and nucleocapsid (N) proteins are marked as indicated. GAPDH was included as the loading control. **(C)** Plaque assay was performed to determine the PFUs of SARS-CoV-2 virus in the supernatant of MK2 cells infected and subjected to inhibitor treatment as described in (A) (Mean $\pm$ SD of triplicate,  $P < .01$ \*\*;  $P < .001$ \*\*\*).

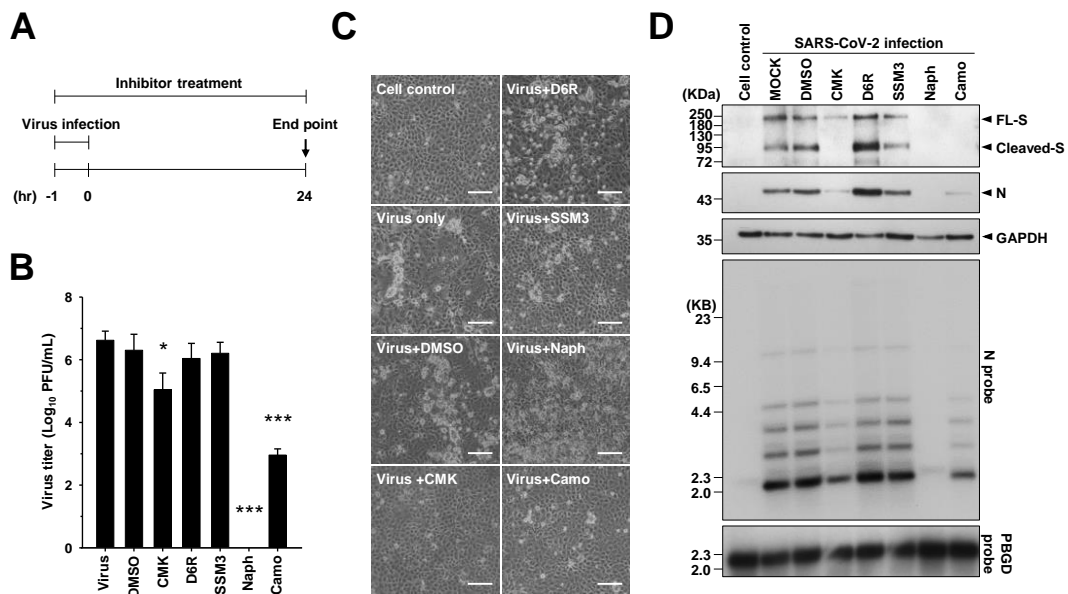

**Figure S3. Co-administration of CMK, naphthofluorescein or camostat inhibitors with virus infection decreased viral production and CPE, in association with reduced viral RNA and protein levels in SARS-CoV-2-infected VeroE6 cells. Related to Figure 5. (A)** Schematic illustration of inhibitor treatment experiments. **(B)** Plaque assay was performed to determine the PFUs of SARS-CoV-2 virus (MOI=1) in the supernatant of VeroE6 cells infected and subjected to inhibitor treatment (including CMK (50  $\mu$ M), D6R (50  $\mu$ M), SSM3 (25  $\mu$ M), naphthofluorescein (20  $\mu$ M) or camostat (500  $\mu$ M)) for 24 hr (Mean $\pm$ SD of triplicate,  $P < .05^*$ ;  $P < .001^{***}$ ). **(C)** Microscopic observation of CPE in VeroE6 cells infected with SARS-CoV-2 and subjected to inhibitor treatment as described in (A), which were assessed at 24 hr post treatment. Scale bars: 100  $\mu$ m. **(D)** Viral protein and viral RNA in SARS-CoV-2-infected VeroE6 cells treated with indicated inhibitors were detected by immunoblot (upper panels) and northern blot (lower panels) analyses.

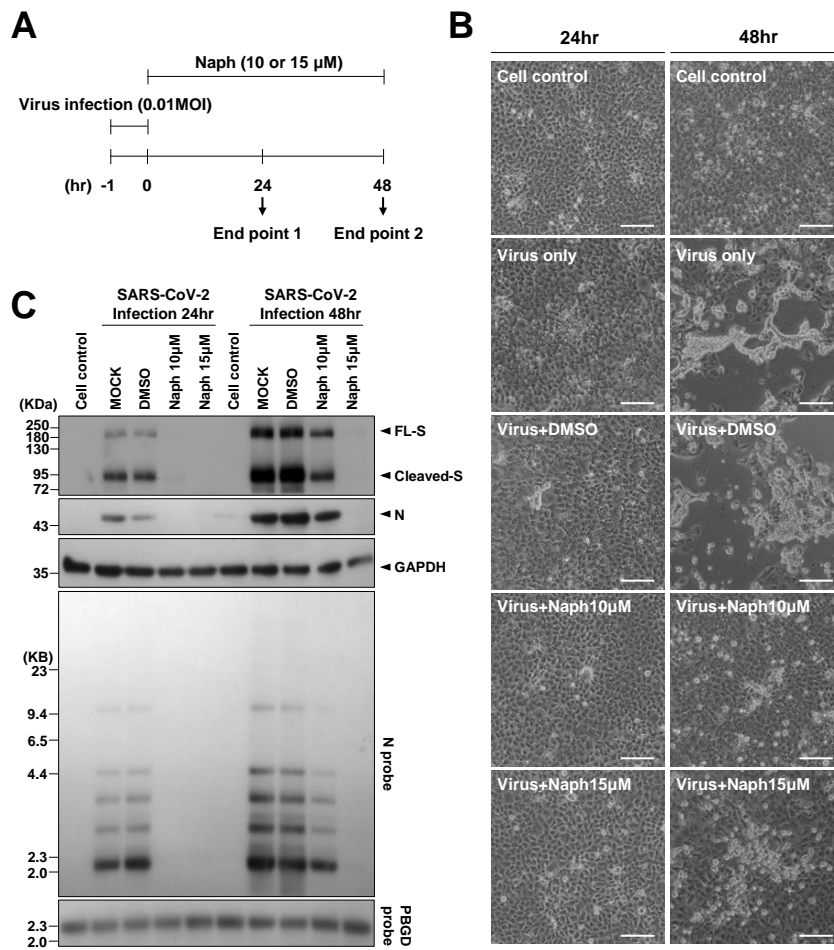

**Figure S4. Post-treatment with naphthofluorescein reduced the viral transcription, showing a lower rate of increase in viral RNA transcripts at different time point. Related to Figure 5. (A)** Schematic illustration of inhibitor treatment experiments. **(B)** Microscopic observation of CPE in VeroE6 cells infected with SARS-CoV-2 and subjected to inhibitor treatment as described in (A), which were assessed at 24 hr and 48 hr post treatment. Scale bars: 100 µm. **(C)** Viral protein and viral RNA in SARS-CoV-2-infected VeroE6 cells treated with naphthofluorescein (10 µM or 15 µM) were detected by immunoblot (upper panels) and northern blot (lower panels) analyses.

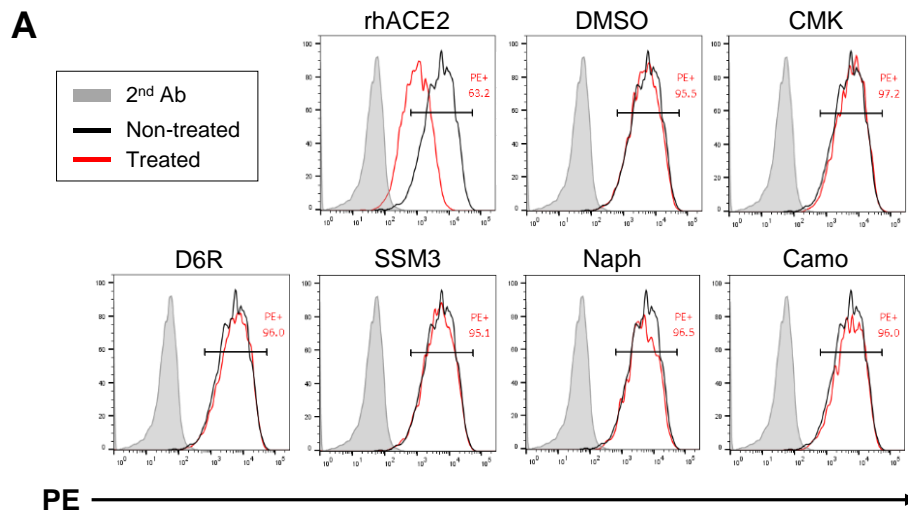

**B**

|                     | Group                              | % of PE+ cells | % of inhibition |
|---------------------|------------------------------------|----------------|-----------------|
|                     | Background 2 <sup>nd</sup> Ab only | 0.02           |                 |
|                     | Negative control Non-treated       | 95.5           |                 |
| Positive control    | rhACE2                             | 63.2           | 33.8            |
|                     | DMSO                               | 95.5           | 0.0             |
|                     | CMK 50 $\mu$ M                     | 97.2           | 0.0             |
| Inhibitor treatment | D6R 50 $\mu$ M                     | 96.0           | 0.0             |
|                     | SSM3 25 $\mu$ M                    | 95.1           | 0.4             |
|                     | Naph 20 $\mu$ M                    | 96.5           | 0.0             |
|                     | Camo 500 $\mu$ M                   | 96.0           | 0.0             |

**Figure S5. Furin/PC and TMPRSS2 inhibitors did not block the binding of the RBD of SARS-CoV-2 spike protein with human ACE2. Related to Figure 5. (A)** Histogram of the flow cytometry results of blockage of RBD-hACE2 binding in 293T/hACE2 stable cell lines, including the positive control (recombinant human ACE2, rhACE2) and the ones with treatment of individual inhibitors as indicated. The X-axis indicates the phycoerythrin (PE) signal. The background signals induced by the secondary antibody are represented by the shaded gray lines, the signals for the non-treated groups are represented by the black lines (negative control), and the signals for the inhibitor treated groups are represented by the red lines. Recombinant human ACE2 is added to block the interaction of spike-RBD and hACE2, which is served as positive control for this assay (33.8% inhibition). **(B)** Quantification results for the flow cytometric data shown in (A).
